# Supplementary material for: Metal acetylacetonates dissolved in UV-curing resin as solid reference material for trace element measurements in organic samples
Source: Royal Society of Chemistry journal article supplement (doi:10.1039/d2ja00287f), 2022-01-01
Supplement: d2ja00287f1.pdf [file d2ja00287f1.pdf]

## Electronic supplementary information

ESI Table 1: Setting of microwave digestion program by Bode.<sup>1</sup>

| <i>Duration in min</i> | <i>Temperature in °C</i> | <i>E in W</i> |
|------------------------|--------------------------|---------------|
| 2.5                    | Room temperature to 80   | 500           |
| 8                      | 80 to 160                | 800           |
| 3                      | 160 to 220               | 1200          |
| 15                     | 220                      | 1200          |

ESI Table 2: Settings of the ICP-OES measurements.

|                                                      | <i>iCAP 6000</i>                                                                                                                                                                                                                                                                                                                                                                                                                                       |
|------------------------------------------------------|--------------------------------------------------------------------------------------------------------------------------------------------------------------------------------------------------------------------------------------------------------------------------------------------------------------------------------------------------------------------------------------------------------------------------------------------------------|
| <i>RF power</i>                                      | 1150 W                                                                                                                                                                                                                                                                                                                                                                                                                                                 |
| <i>Plasma gas flow (Ar)</i>                          | 14 L/min                                                                                                                                                                                                                                                                                                                                                                                                                                               |
| <i>Auxiliary gas flow (Ar)</i>                       | 0.7 L/min                                                                                                                                                                                                                                                                                                                                                                                                                                              |
| <i>Nebulizer gas flow (Ar)</i>                       | 0.6 L/min                                                                                                                                                                                                                                                                                                                                                                                                                                              |
| <i>Pumping rate</i>                                  | 25 rpm                                                                                                                                                                                                                                                                                                                                                                                                                                                 |
| <i>Measurement mode</i>                              | axial and radial                                                                                                                                                                                                                                                                                                                                                                                                                                       |
| <i>Wavelengths Fe</i>                                | 259.940 nm, 238.204 nm, 239.562 nm, 240.488 nm, 261.187 nm                                                                                                                                                                                                                                                                                                                                                                                             |
| <i>Wavelengths single element layer measurements</i> | Al: 308.215 nm, 394.401 nm, 396.152 nm<br>Ca: 315.887 nm*, 396.847 nm*, 422.673 nm*<br>Cd: 226.502 nm, 228.802nm<br>Co: 228.616 nm, 237.862 nm, 238.892 nm<br>Cr: 267.716 nm, 283.563 nm, 284.325<br>Fe: 238.204 nm, 239.562 nm, 259.940 nm<br>La: 333.749 nm, 379.478 nm, 412.323 nm<br>Mg: 279.553 nm*, 280.270 nm*, 285.213 nm*<br>Pb: 216.999 nm, 220.353 nm, 261.418 nm<br>Sr: 216.596 nm*, 421.552 nm*<br>Zn: 202.548 nm, 206.200 nm, 213.856 nm |

\* Were measured in axial and radial mode.

ESI Table 3: LOD and LOQ and Blank levels, according to calibration curve method from DIN 32645.

|                                     | <b>XRF</b> | <b>LA-ICP-MS</b> |       |       |       | <b>LIBS</b>       |                   |                   |                   |
|-------------------------------------|------------|------------------|-------|-------|-------|-------------------|-------------------|-------------------|-------------------|
|                                     |            | 54 Fe            | 56 Fe | 57 Fe | 58 Fe | Fe<br>238,2<br>nm | Fe<br>239,5<br>nm | Fe<br>259,9<br>nm | Fe<br>275,6<br>nm |
| <b>LOD<br/>[mg/kg]</b>              | 39         | 162              | 146   | 139   | 148   | 271               | 353               | 506               | 509               |
| <b>LOQ<br/>[mg/kg]</b>              | 144        | 556              | 504   | 483   | 511   | 885               | 1136              | 1674              | 1684              |
| <b>Mean<br/>Blank<br/>intensity</b> | 1613       | -72              | 421   | -15   | 31    | 0,0225            | 0,0227            | 0,0139            | 0,0141            |
| <b>STD<br/>Blank</b>                | 335        | 2379             | 4470  | 122   | 188   | 0,0383            | 0,0765            | 0,1060            | 0,0773            |
| <b>Mean<br/>Blank<br/>[mg/kg]</b>   | -2         | 82               | 95    | 93    | 111   | 109               | 207               | 108               | 243               |

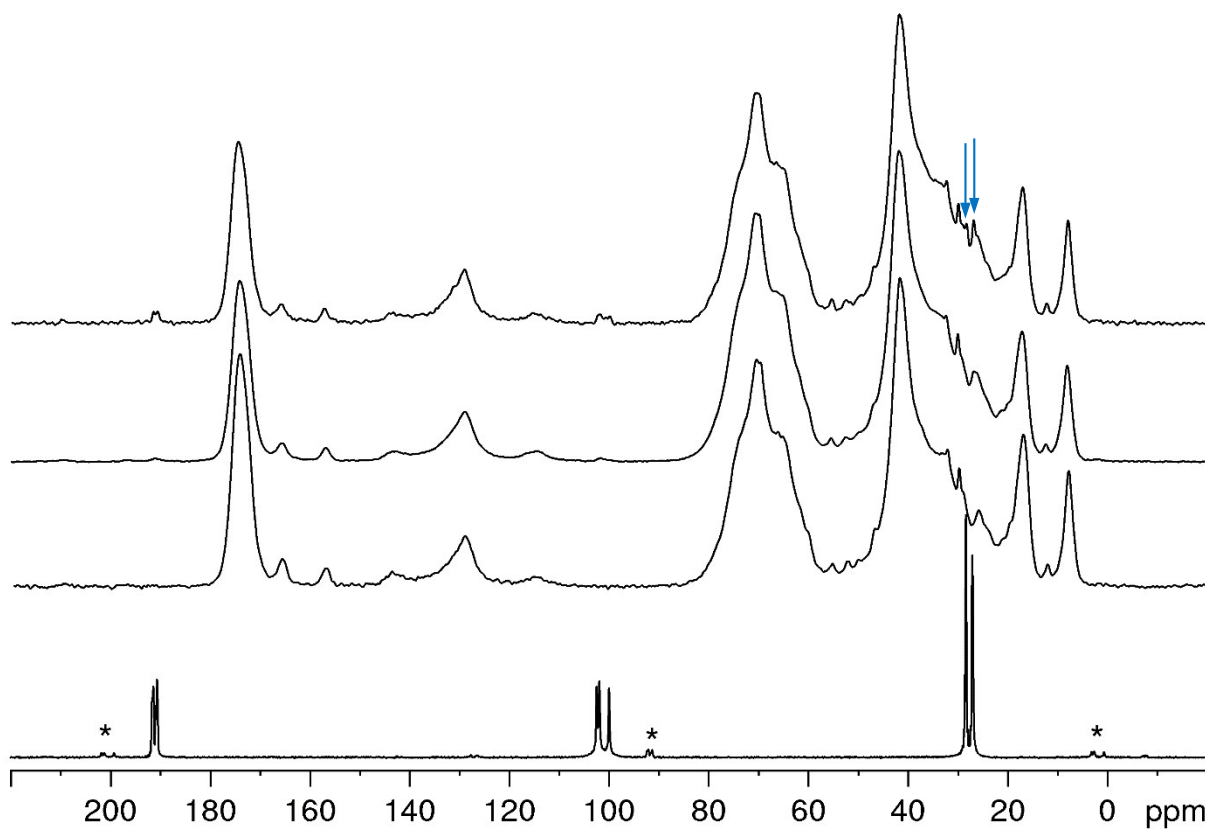

Figure 1: Comparison of the  $^{13}\text{C}$  CP/MAS NMR spectra. From bottom to top: pure  $\text{Al}(\text{acac})_3$ , polymer lacquer without and with 1000 mg/kg and 2000 mg/kg  $\text{Al}(\text{acac})_3$  added, respectively. Asterisks mark spinning side bands ( $\nu\text{R} = 10$  kHz). Small arrows indicate the remaining methyl signals of  $\text{Al}(\text{acac})_3$  in the upper spectrum. Note that these signals cannot be detected in the 1000 mg/kg  $\text{Al}(\text{acac})_3$  lacquer indicating an incorporation into the polymer network.

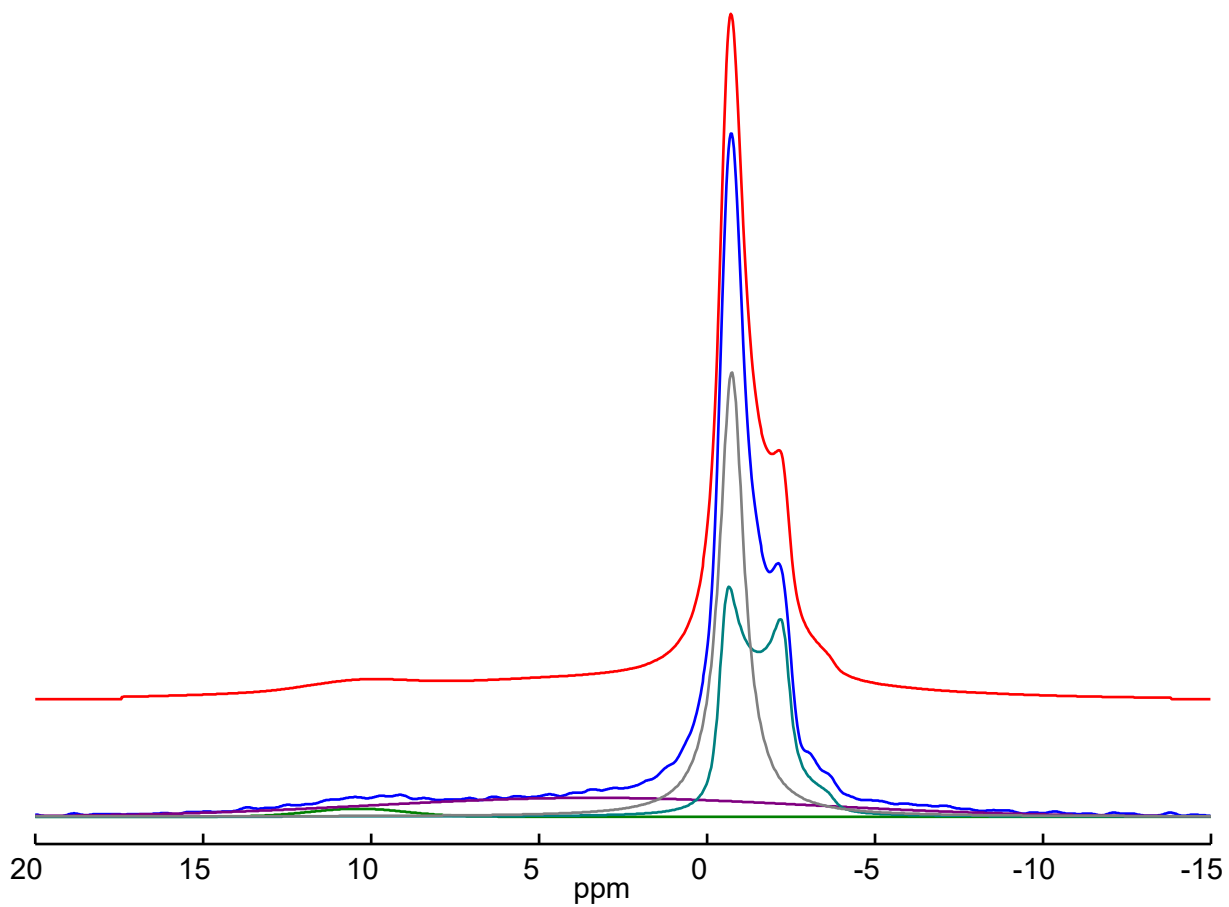

Figure 2: Deconvolution of the  $^{27}\text{Al}$  MAS spectrum of the sample containing 2000 mg/kg  $\text{Al}(\text{acac})_3$ , blue: experimental spectrum, red: sum of the signals obtained during deconvolution, the signal in green was obtained using the quadrupolar parameters for  $\text{Al}(\text{acac})_3$  with increased line broadening. The low intensity signals  $> 0$  ppm are not resolved and should not be interpreted and are therefore approximated by a minimum number of two broad signals (DMFIT)<sup>2</sup>

## References

- 1 J. Bode, PhD thesis, TU Bergakademie Freiberg, 2021.
- 2 D. Massiot, F. Fayon, M. Capron, I. King, S. Le Calvé, B. Alonso, J.-O. Durand, B. Bujoli, Z. Gan and G. Hoatson, Modelling one- and two-dimensional solid-state NMR spectra, *Magn. Reson. Chem.*, 2002, **40**, 70–76.
